# Supplementary material for: Using virtual reality for anatomical landmark annotation in geometric morphometrics
Source: PeerJ journal article supplement (doi:10.7717/peerj.12869), 2022-02-07
Supplement: Supplemental_Table_S1.pdf [file Supplemental_Table_S1.pdf]

**Table S1. Pre-defined, randomized order of landmark data collection.** The operators were instructed to go through this table column-wise, starting to place landmarks on specimen 323 using virtual reality (top left cell), and ending on specimen C7 using Stratovan Checkpoint (bottom right cell).

| System \ Replica     | 1     | 2     | 3     | 4     | 5     | 6     |
|----------------------|-------|-------|-------|-------|-------|-------|
| Virtual reality      | 323   | 96    | 223   | 323   | 96    | 223   |
| Virtual reality      | 223   | 223   | 96    | 96    | 323   | 323   |
| Stratovan Checkpoint | 96    | 323   | 323   | 223   | 223   | 96    |
| Stratovan Checkpoint | 42.11 | C7    | 664   | 42.11 | C7    | 664   |
| Virtual reality      | 664   | 664   | C7    | C7    | 42.11 | 42.11 |
| Virtual reality      | C7    | 42.11 | 42.11 | 664   | 664   | C7    |
| Stratovan Checkpoint | 323   | 96    | 223   | 323   | 96    | 223   |
| Stratovan Checkpoint | 223   | 223   | 96    | 96    | 323   | 323   |
| Virtual reality      | 96    | 323   | 323   | 223   | 223   | 96    |
| Virtual reality      | 42.11 | C7    | 664   | 42.11 | C7    | 664   |
| Stratovan Checkpoint | 664   | 664   | C7    | C7    | 42.11 | 42.11 |
| Stratovan Checkpoint | C7    | 42.11 | 42.11 | 664   | 664   | C7    |
