# Supplementary material for: Using virtual reality for anatomical landmark annotation in geometric morphometrics
Source: PeerJ journal article supplement (doi:10.7717/peerj.12869), 2022-02-07
Supplement: Supplemental_Table_S2.pdf [file Supplemental_Table_S2.pdf]

**Table S2. ANOVA, separately for each landmark, without the exclusion of outliers of type 2).** There were two outliers, one placed at landmark 11, and 28, respectively. Dependent variable is log-transformed Euclidean distance between single landmark measurements and landmark means. We applied the following crossed structure: System  $\times$  Operator  $\times$  Specimen. Residuals reflect landmark replica, and have 240 degrees of freedom.

| Variables                | Df | F     | Pr(>F) | F     | Pr(>F) | F      | Pr(>F) |
|--------------------------|----|-------|--------|-------|--------|--------|--------|
|                          |    | LM 2  |        | LM 3  |        | LM 11  |        |
| System                   | 1  | 2.32  | 0.129  | 0.54  | 0.461  | 8.65   | 0.004  |
| Operator                 | 3  | 21.15 | 0.000  | 76.02 | 0.000  | 37.46  | 0.000  |
| Specimen                 | 5  | 2.36  | 0.041  | 42.54 | 0.000  | 32.99  | 0.000  |
| System:Operator          | 3  | 0.89  | 0.445  | 1.34  | 0.261  | 3.49   | 0.016  |
| System:Specimen          | 5  | 2.16  | 0.059  | 0.43  | 0.825  | 2.60   | 0.026  |
| Operator:Specimen        | 15 | 1.73  | 0.047  | 4.20  | 0.000  | 7.65   | 0.000  |
| System:Operator:Specimen | 15 | 0.82  | 0.657  | 2.45  | 0.002  | 2.85   | 0.000  |
|                          |    | LM 18 |        | LM 24 |        | LM 28  |        |
| System                   | 1  | 1.73  | 0.190  | 0.98  | 0.324  | 0.13   | 0.722  |
| Operator                 | 3  | 31.91 | 0.000  | 51.97 | 0.000  | 17.49  | 0.000  |
| Specimen                 | 5  | 21.60 | 0.000  | 12.32 | 0.000  | 174.03 | 0.000  |
| System:Operator          | 3  | 0.42  | 0.741  | 2.01  | 0.113  | 7.73   | 0.000  |
| System:Specimen          | 5  | 0.91  | 0.476  | 4.24  | 0.001  | 1.93   | 0.091  |
| Operator:Specimen        | 15 | 2.64  | 0.001  | 6.18  | 0.000  | 8.02   | 0.000  |
| System:Operator:Specimen | 15 | 1.59  | 0.077  | 3.42  | 0.000  | 1.52   | 0.100  |
