# Supplementary material for: Using virtual reality for anatomical landmark annotation in geometric morphometrics
Source: PeerJ journal article supplement (doi:10.7717/peerj.12869), 2022-02-07
Supplement: Supplemental_Table_S3.pdf [file Supplemental_Table_S3.pdf]

**Table S3. Procrustes ANOVA on shape, without the exclusion of outliers of type 2).** We applied the following crossed structure: System  $\times$  Operator  $\times$  Specimen. Residuals reflect landmark replica. The R-squared values (Rsq) give estimates of the relative contribution of each factor to total shape variation.

| Variables                | Df  | MS      | Rsq    | F       | Pr(>F) |
|--------------------------|-----|---------|--------|---------|--------|
| System                   | 1   | 0.00033 | 0.0003 | 1.266   | 0.229  |
| Operator                 | 3   | 0.00542 | 0.0160 | 20.992  | 0.001  |
| Specimen                 | 5   | 0.18340 | 0.8997 | 710.075 | 0.001  |
| System:Operator          | 3   | 0.00039 | 0.0012 | 1.515   | 0.050  |
| System:Specimen          | 5   | 0.00031 | 0.0015 | 1.203   | 0.159  |
| Operator:Specimen        | 15  | 0.00113 | 0.0166 | 4.364   | 0.001  |
| System:Operator:Specimen | 15  | 0.00027 | 0.0040 | 1.040   | 0.364  |
| Residuals                | 240 | 0.00026 | 0.0608 |         |        |
